# Supplementary material for: Occurrence of Polyamines in Foods and the Influence of Cooking Processes
Source: MDPI journal article supplement (doi:10.3390/foods10081752), 2021-07-29
Supplement: s1 [file foods-1319688-supplementary.pdf › foods-1319688-supplementary.pdf]

Table S1. Polyamine content (mg/kg) in food of plant origin.

| Food categories   | n  | Occurrence of polyamines (mg/kg) |               |            |            |             |              |
|-------------------|----|----------------------------------|---------------|------------|------------|-------------|--------------|
|                   |    | Spermidine                       |               | Spermine   |            | Putrescine  |              |
|                   |    | Mean ± SD                        | min – max     | Mean ± SD  | min – max  | Mean ± SD   | min – max    |
| <b>Vegetables</b> |    |                                  |               |            |            |             |              |
| Artichoke         | 5  | 19.1 ± 13.9                      | 8.1 - 42.1    | 11.5 ± 9.8 | 4.9 - 28.6 | 4.8 ± 2.3   | 2.1 - 6.7    |
| Broccoli          | 5  | 34.8 ± 2.1                       | 33.3 - 36.3   | 6.9 ± 0.6  | 6.5 - 7.3  | 8.2 ± 0.5   | 7.9 - 8.6    |
| Cabbage           | 3  | 15.9 ± 1.2                       | 14.7 - 17.2   | 1.1 ± 1.8  | Nd - 3.2   | 7.4 ± 0.6   | 7.0 - 8.1    |
| Carrot            | 14 | 6.1 ± 2.2                        | 4.3 - 11.2    | 1.4 ± 0.6  | 0.4 - 2.3  | 2.2 ± 2.0   | 0.4 - 8.9    |
| Cauliflower       | 5  | 25.6 ± 5.7                       | 19.1 - 32.9   | 4.4 ± 1.7  | 2.3 - 6.6  | 4.1 ± 2.1   | 1.6 - 7.1    |
| Celery            | 3  | 4.6 ± 2.1                        | 2.7 - 6.4     | 2.0 ± 0.9  | 1.3 - 2.6  | 1.8 ± 0.2   | 1.5 - 2.0    |
| Chard             | 8  | 11.9 ± 2.7                       | 8.3 - 15.4    | 1.0 ± 0.8  | 0.2 - 2.7  | 6.4 ± 3.2   | 2.4 - 11.9   |
| Cucumber          | 10 | 7.6 ± 2.1                        | 5.1 - 10.6    | 0.9 ± 1.0  | 0.2 - 2.9  | 5.4 ± 3.1   | 1.3 - 10.6   |
| Eggplant          | 23 | 5.1 ± 1.9                        | 2.5 - 8.0     | 0.5 ± 0.5  | Nd - 1.4   | 34.3 ± 7.0  | 24.1 - 48.6  |
| Endive            | 6  | 11.5 ± 2.4                       | 10.9 - 14.4   | 2.2 ± 0.5  | 1.5 - 2.6  | 13.6 ± 2.0  | 11.3 - 15.9  |
| Green Beans       | 12 | 10.8 ± 4.7                       | 2.9 - 16.9    | 2.7 ± 1.9  | 0.7 - 7.2  | 10.3 ± 8.6  | 3.0 - 28.8   |
| Green pepper      | 9  | 9.8 ± 8.3                        | Nd - 24.3     | 7.8 ± 5.7  | Nd - 17.6  | 90.0 ± 41.7 | 11.7 - 149.0 |
| Leek              | 3  | 17.3 ± 5.0                       | 11.6 - 22.5   | Nd         | Nd         | 1.9 ± 0.6   | 1.2 - 2.4    |
| Lettuce           | 2  | 8.6 ± 0.4                        | 8.3 - 8.8     | Nd         | Nd         | 3.1 ± 1.2   | 2.2 - 3.9    |
| Mushroom          | 11 | 128.5 ± 14.6                     | 106.3 - 155.0 | 3.1 ± 0.4  | 2.4 - 3.8  | 1.3 ± 1.2   | 0.0 - 3.7    |
| Onion             | 4  | 0.6 ± 0.3                        | 0.2 - 0.7     | Nd         | Nd         | 0.1 ± 0.1   | Nd - 0.1     |
| Peas              | 9  | 54.4 ± 19.6                      | 27.5 - 97.1   | 6.1 ± 2.4  | 3.1 - 9.9  | 34.3 ± 13.5 | 8.7 - 54.4   |
| Potato            | 10 | 8.8 ± 1.9                        | 5.6 - 12.3    | 2.6 ± 0.8  | 1.5 - 4.3  | 4.1 ± 3.1   | 1.1 - 11.7   |
| Pumpkin           | 13 | 9.7 ± 3.6                        | 1.8 - 15.0    | 1.9 ± 2.0  | 0.5 - 6.9  | 10.7 ± 6.8  | 3.0 - 24.2   |
| Radish            | 5  | 14.7 ± 12.4                      | 0.9 - 28.2    | 4.2 ± 4.8  | 1.5 - 12.3 | 8.1 ± 4.2   | 3.8 - 13.1   |
| Red pepper        | 8  | 4.1 ± 0.7                        | 3.1 - 5.0     | 1.8 ± 0.8  | 0.6 - 2.7  | 2.4 ± 2.2   | 0.6 - 5.4    |
| Spinach           | 18 | 28.2 ± 9.7                       | 15.6 - 53.0   | 3.3 ± 1.9  | Nd - 8.9   | 4.5 ± 2.5   | 0.1 - 9.2    |
| Soy sprouts       | 3  | 11.2 ± 2.1                       | 10.5 - 11.7   | 0.5 ± 0.4  | 0.3 - 0.9  | 44.7 ± 3.2  | 41.1 - 47.4  |
| Tomato            | 53 | 3.0 ± 1.4                        | 2.9 - 7.9     | 0.1 ± 0.1  | 0.7 - 0.7  | 16.5 ± 6.9  | 6.3 - 35.6   |
| Wheat asparagus   | 5  | 25.1 ± 7.4                       | 14.1 - 32.5   | 4.8 ± 1.3  | 2.6 - 5.7  | 13.1 ± 2.8  | 8.6 - 16.3   |
| White asparagus   | 4  | 2.8 ± 0.5                        | 2.4 - 3.3     | 0.8 ± 0.2  | 0.5 - 1.0  | 0.8 ± 0.2   | 0.5 - 1.0    |
| Zucchini          | 41 | 9.2 ± 2.9                        | 5.4 - 14.9    | 1.4 ± 1.5  | 0.2 - 6.1  | 7.9 ± 4.1   | 2.7 - 24.8   |
| <b>Fruits</b>     |    |                                  |               |            |            |             |              |
| Apricot           | 4  | 5.9 ± 1.6                        | 4.2 - 7.7     | 0.2 ± 0.4  | Nd - 0.9   | 0.6 ± 0.3   | 0.3 - 1.0    |
| Avocado           | 5  | 3.2 ± 3.3                        | 0.2 - 6.7     | 4.5 ± 2.5  | 2.0 - 7.9  | 0.1 ± 0.1   | Nd - 0.3     |
| Banana            | 8  | 11.9 ± 2.9                       | 7.6 - 15.8    | 1.3 ± 1.0  | Nd - 2.8   | 38.0 ± 8.3  | 25.5 - 49.5  |
| Cantaloupe        | 3  | 7.7 ± 0.9                        | 6.8 - 8.7     | Nd         | Nd         | 0.8 ± 0.3   | 0.6 - 1.1    |
| Cherry            | 2  | 2.4 ± 0.2                        | 2.3 - 2.5     | Nd         | Nd         | 3.4 ± 0.1   | 3.4 - 3.5    |
| Fig               | 2  | 8.8 ± 0.4                        | 8.6 - 9.1     | 2.2 ± 0.3  | 2.0 - 2.4  | 2.4 ± 0.3   | 2.2 - 2.6    |
| Grapefruit        | 9  | 3.3 ± 1.8                        | 1.1 - 5.4     | 0.7 ± 1.4  | Nd - 3.5   | 9.4 ± 11.9  | Nd - 28.0    |
| Grapes            | 10 | 5.3 ± 2.6                        | Nd - 9.7      | 2.6 ± 0.1  | 2.4 - 2.7  | 2.7 ± 0.3   | 1.0 - 4.3    |
| Kiwi              | 10 | 5.4 ± 1.1                        | 2.7 - 6.4     | 0.7 ± 0.6  | Nd - 1.5   | 1.5 ± 0.5   | 0.5 - 2.2    |
| Lemon             | 5  | 2.3 ± 0.6                        | 1.9 - 3.2     | 0.8 ± 0.7  | Nd - 1.6   | 2.8 ± 1.1   | 1.2 - 3.7    |
| Loquat            | 2  | 2.4 ± 0.2                        | 2.3 - 2.5     | Nd         | Nd         | 1.2 ± 0.3   | 1.0 - 1.3    |
| Mango             | 5  | 14.4 ± 4.3                       | 10.3 - 19.1   | 1.2 ± 1.6  | Nd - 3.0   | 1.1 ± 0.7   | 0.6 - 2.3    |
| Orange            | 12 | 2.4 ± 0.9                        | 1.5 - 4.2     | 0.1 ± 0.3  | Nd - 1.1   | 91.2 ± 41.7 | 11.3 - 151.1 |
| Orange juice      | 5  | 5.2 ± 0.6                        | 1.6 - 5.8     | 3.6 ± 3.1  | Nd - 5.4   | 41.9 ± 9.2  | 35.1 - 57.3  |

|                                |    |              |               |             |             |             |              |
|--------------------------------|----|--------------|---------------|-------------|-------------|-------------|--------------|
| Papaya                         | 6  | 9.9 ± 4.5    | 6.1 - 15.9    | 1.0 ± 1.2   | Nd - 2.4    | 7.3 ± 5.8   | Nd - 12.5    |
| Peach                          | 2  | 3.5 ± 0.9    | 2.8 - 4.1     | Nd          | Nd          | 1.9 ± 0.1   | 1.8 - 2.0    |
| Pineapple                      | 2  | 3.1 ± 0.1    | 3.0 - 3.2     | 0.6 ± 0.3   | 0.3 - 0.8   | 3.5 ± 0.1   | 3.4 - 3.6    |
| Plum                           | 2  | 2.7 ± 0.3    | 2.5 - 2.9     | 1.7 ± 2.5   | Nd - 3.5    | 0.1 ± 0.1   | Nd - 0.1     |
| Raspberry                      | 4  | 7.6 ± 1.3    | 6.3 - 9.4     | 2.0 ± 1.6   | Nd - 3.7    | 0.5 ± 0.5   | Nd - 1.0     |
| Strawberries                   | 9  | 6.0 ± 1.6    | 4.6 - 9.9     | 0.5 ± 0.7   | Nd - 1.6    | 3.8 ± 1.5   | 2.0 - 6.4    |
| Tangerine                      | 21 | 2.6 ± 1.6    | 0.2 - 6.2     | Nd          | Nd          | 90.2 ± 36.6 | 12.3 - 173.8 |
| Watermelon                     | 2  | 12.3 ± 0.1   | 12.2 - 12.4   | Nd          | Nd          | 2.1 ± 0.0   | 2.1 - 2.2    |
| <b>Cereals and derivatives</b> |    |              |               |             |             |             |              |
| Wheat germ                     | 2  | 325.5 ± 3.0  | 323.3 - 327.6 | 84.2 ± 0.3  | 84.0 - 84.4 | 31.6 ± 0.4  | 31.4 - 31.9  |
| Barley                         | 2  | 3.9 ± 2.0    | 2.5 - 5.3     | 5.6 ± 2.0   | 4.2 - 7.0   | 2.2 ± 1.6   | 1.1 - 3.3    |
| Oats                           | 5  | 8.4 ± 4.7    | 3.3 - 12.2    | 4.9 ± 1.0   | 3.5 - 5.8   | 2.8 ± 2.0   | 0.4 - 4.3    |
| Rice                           | 5  | 1.8 ± 1.0    | 0.7 - 3.0     | 3.4 ± 1.1   | 2.5 - 4.8   | 1.9 ± 0.5   | 1.4 - 2.4    |
| Corn                           | 5  | 6.8 ± 6.5    | 1.1 - 14.1    | 0.3 ± 0.4   | Nd - 0.9    | 38.4 ± 9.5  | 30.5 - 54.8  |
| White bread                    | 6  | 8.5 ± 6.7    | 3.0 - 17.8    | 1.8 ± 1.6   | Nd - 3.6    | 1.1 ± 0.5   | 0.3 - 1.7    |
| Wholegrain bread               | 6  | 12.3 ± 10.3  | 3.6 - 35.8    | 0.5 ± 0.9   | Nd - 2.2    | 2.0 ± 1.5   | Nd - 4.3     |
| Natural pasta                  | 5  | 7.3 ± 1.5    | 2.0 - 5.1     | 4.1 ± 1.2   | 2.0 - 5.1   | 1.8 ± 1.7   | Nd - 3.1     |
| Wheat pasta                    | 5  | 14.4 ± 4.0   | 9.9 - 20.82   | 7.5 ± 1.9   | 5.9 - 10.3  | 4.0 ± 0.8   | 3.0 - 2.6    |
| Vegetable pasta                | 5  | 9.7 ± 3.5    | 6.3 - 14.5    | 6.0 ± 1.6   | 4.3 - 7.9   | 1.9 ± 0.8   | 0.8 - 2.5    |
| Whole grain cereals            | 6  | 13.5 ± 7.8   | 0.9 - 25.0    | 6.2 ± 2.7   | 1.6 - 2.7   | 3.7 ± 1.6   | 1.5 - 6.0    |
| Cereals with chocolate         | 6  | 4.1 ± 2.2    | 0.5 - 6.3     | 1.4 ± 1.8   | Nd - 4.7    | 1.4 ± 0.9   | 0.8 - 3.1    |
| <b>Legumes</b>                 |    |              |               |             |             |             |              |
| Beans                          | 5  | 13.3 ± 1.5   | 11.0 - 14.5   | 13.6 ± 4.5  | 5.1 - 17.2  | 0.7 ± 0.7   | 0.4 - 2.0    |
| Broad beans                    | 10 | 72.0 ± 3.9   | 54.6 - 94.2   | 24.0 ± 3.8  | 18.9 - 30.8 | 17.9 ± 0.4  | 17.3 - 18.0  |
| Chickpeas                      | 5  | 43.0 ± 37.3  | 15.3 - 85.4   | 15.9 ± 14.8 | 4.3 - 32.4  | 4.8 ± 3.1   | 0.9 - 8.9    |
| Lentils                        | 7  | 43.7 ± 41.7  | 14.5 - 107.4  | 9.5 ± 5.1   | 5.1 - 18.4  | 8.2 ± 8.4   | 2.0 - 21.8   |
| Soybean                        | 2  | 99.6 ± 3.5   | 97.1 - 102.0  | 26.6 ± 7.8  | 20.1 - 31.1 | 19.1 ± 4.4  | 15.9 - 22.2  |
| Soy drink                      | 8  | 10.1 ± 0.5   | 9.1 - 11.0    | 2.2 ± 0.6   | 1.6 - 3.2   | 1.3 ± 0.4   | 0.7 - 2.1    |
| Tofu                           | 8  | 20.8 ± 6.3   | 3.4 - 30.2    | 4.5 ± 3.0   | Nd - 8.1    | 0.8 ± 0.6   | Nd - 1.5     |
| Natto                          | 3  | 66.4 ± 9.2   | 56.9 - 75.2   | 10.1 ± 1.0  | 9.2 - 11.2  | 7.4 ± 1.9   | 5.8 - 9.5    |
| Tempeh                         | 3  | 108.9 ± 13.7 | 97.3 - 124.0  | 12.6 ± 8.3  | 6.1 - 21.9  | 23.2 ± 7.0  | 17.5 - 31.1  |
| Tamari                         | 3  | 34.8 ± 4.6   | 29.5 - 38.0   | 4.4 ± 2.1   | 2.8 - 6.8   | 15.3 ± 2.0  | 13.1 - 17.1  |
| Miso                           | 3  | 8.4 ± 1.3    | 7.5 - 9.9     | 2.9 ± 0.6   | 2.5 - 3.5   | 11.4 ± 7.8  | 2.7 - 17.8   |
| Sufu                           | 3  | 0.5 ± 0.8    | Nd - 1.4      | 1.8 ± 0.8   | 0.9 - 2.2   | 14.2 ± 4.7  | 9.3 - 18.8   |
| Soy sauce                      | 3  | 21.9 ± 1.7   | 19.9 - 22.9   | 1.9 ± 0.3   | 1.5 - 2.1   | 7.2 ± 0.4   | 7.0 - 7.6    |
| <b>Nuts and seeds</b>          |    |              |               |             |             |             |              |
| Almonds                        | 7  | 21.0 ± 4.9   | 14.4 - 25.6   | 17.5 ± 5.0  | 11.4 - 23.9 | 2.5 ± 1.2   | Nd - 4.4     |
| Cashew nuts                    | 2  | 29.7 ± 4.7   | 26.3 - 33.0   | 14.0 ± 0.3  | 13.7 - 14.2 | 6.1 ± 0.7   | 5.7 - 6.6    |
| Chestnuts                      | 5  | 26.7 ± 7.1   | 14.2 - 31.5   | 9.2 ± 4.2   | 2.9 - 13.7  | 4.6 ± 1.7   | 2.1 - 6.9    |
| Hazelnut                       | 9  | 18.2 ± 6.9   | 9.0 - 29.5    | 4.9 ± 2.3   | 2.0 - 9.3   | 1.2 ± 1.1   | Nd - 3.2     |
| Peanuts                        | 8  | 33.7 ± 13.4  | 22.6 - 58.3   | 8.0 ± 2.8   | 5.2 - 12.5  | 1.4 ± 1.8   | 0.2 - 5.0    |
| Sunflower seeds                | 5  | 68.7 ± 58.0  | 14.3 - 140.6  | 14.7 ± 8.5  | 6.5 - 23.4  | 1.4 ± 0.8   | 0.4 - 2.0    |
| Pistachios                     | 7  | 27.1 ± 7.4   | 14.9 - 35.5   | 22.3 ± 13.7 | 10.8 - 50.8 | 14.8 ± 14.0 | 4.3 - 39.5   |
| Sesame                         | 2  | 50.9 ± 2.6   | 49.1 - 52.7   | 19.3 ± 0.9  | 18.7 - 19.9 | 11.5 ± 0.5  | 11.2 - 11.5  |
| Walnuts                        | 6  | 16.4 ± 6.6   | 6.2 - 23.8    | 9.0 ± 3.3   | 6.3 - 13.6  | 5.6 ± 4.2   | 2.8 - 13.8   |

Nd- not detected; All samples were analyzed in duplicate.

Table S2. Polyamine content (mg/kg) in food of animal origin.

| Food categories             | n   | Occurrence of polyamines (mg/kg) |            |             |             |               |             |
|-----------------------------|-----|----------------------------------|------------|-------------|-------------|---------------|-------------|
|                             |     | Spermidine                       |            | Spermine    |             | Putrescine    |             |
|                             |     | Mean ± SD                        | min – max  | Mean ± SD   | min – max   | Mean ± SD     | min – max   |
| <b>Meat and derivatives</b> |     |                                  |            |             |             |               |             |
| Raw beef meat               | 5   | 2.5 ± 0.3                        | 2.4 - 2.6  | 26.6 ± 8.0  | 22.1 - 33.4 | 2.0 ± 0.8     | 1.6 - 2.7   |
| Raw pork meat               | 5   | 1.6 ± 0.6                        | 0.9 - 2.6  | 34.1 ± 2.7  | 30.7 - 38.1 | 0.1 ± 0.2     | 0.0 - 0.5   |
| Raw chicken meat            | 5   | 7.2 ± 2.5                        | 4.5 - 11.3 | 57.3 ± 4.5  | 51.0 - 63.3 | 1.0 ± 0.6     | 1.0 - 29.8  |
| Cured ham                   | 23  | 5.7 ± 1.0                        | 4.1 - 7.3  | 35.8 ± 8.2  | 25.0 - 62.1 | 3.9 ± 4.0     | Nd - 17.4   |
| Cooked ham                  | 20  | 2.1 ± 0.6                        | 1.4 - 3.5  | 24.8 ± 17.0 | 6.0 - 87.8  | 1.0 ± 2.8     | Nd - 12.4   |
| Mortadella                  | 20  | 4.0 ± 2.3                        | 1.0 - 8.9  | 17.2 ± 7.5  | 8.0 - 32.2  | 1.6 ± 1.7     | Nd - 5.7    |
| Chorizo                     | 107 | 4.6 ± 5.5                        | 0.0 - 32.1 | 23.3 ± 17.0 | Nd - 87.2   | 98.8 ± 115.2  | Nd - 471.5  |
| Fuet/Longaniza              | 305 | 5.8 ± 6.1                        | Nd - 32.7  | 26.3 ± 25.9 | Nd - 224.2  | 57.7 ± 92.6   | Nd - 537.1  |
| Sobrasada                   | 12  | 2.2 ± 2.0                        | Nd - 7.0   | 9.3 ± 6.2   | Nd - 17.8   | 74.8 ± 141.6  | Nd - 500.6  |
| Egg                         | 14  | 3.6 ± 1.5                        | Nd - 4.5   | 4.5 ± 1.7   | 0.3 - 5.3   | Nd            | Nd          |
| <b>Fish and seafood</b>     |     |                                  |            |             |             |               |             |
| Fresh tuna                  | 20  | 6.7 ± 3.7                        | 1.2 - 11.7 | 17.5 ± 11.9 | 1.1 - 37.0  | 0.7 ± 1.2     | Nd - 4.9    |
| Tuna canned in oil          | 37  | 4.5 ± 3.0                        | 1.5 - 19.5 | 12.1 ± 6.58 | 2.2 - 35.2  | 0.5 ± 0.7     | Nd - 2.2    |
| Fresh hake                  | 88  | 2.5 ± 1.9                        | Nd - 8.2   | 6.8 ± 2.8   | Nd - 13.5   | 1.0 ± 2.1     | Nd - 11.0   |
| Fresh salmon                | 5   | 10.0 ± 3.2                       | 7.0 - 15.2 | 12.0 ± 24.0 | Nd - 54.8   | 10.5 ± 178.0  | 2.6 - 400.0 |
| Fresh cod                   | 5   | 6.8 ± 1.6                        | 5.0 - 8.9  | Nd          | Nd          | Nd            | Nd          |
| Fresh anchovies             | 10  | 7.1 ± 2.5                        | 4.0 - 11.9 | 10.6 ± 3.0  | 7.0 - 15.4  | 1.7 ± 1.7     | Nd - 4.9    |
| Anchovies canned            | 16  | 1.0 ± 0.4                        | 0.4 - 1.7  | 2.7 ± 0.7   | 1.2 - 4.3   | 1.7 ± 1.8     | Nd - 5.7    |
| Mussels                     | 3   | 0.9 ± 0.2                        | 0.7 - 1.1  | 18.0 ± 1.8  | 16.1 - 19.7 | 1.6 ± 0.2     | 1.4 - 1.8   |
| Shrimp                      | 4   | 6.4 ± 1.8                        | 4.0 - 8.4  | 5.2 ± 0.2   | 4.9 - 5.4   | 4.1 ± 3.8     | 1.8 - 9.8   |
| <b>Dairy products</b>       |     |                                  |            |             |             |               |             |
| Fresh milk                  | 3   | 0.1 ± 0.1                        | Nd - 0.2   | Nd          | Nd          | 0.1 ± 0.2     | Nd - 0.3    |
| Yogurt                      | 5   | 1.1 ± 0.8                        | 0.5 - 1.8  | 0.3 ± 0.4   | Nd - 0.5    | 2.0 ± 2.0     | Nd - 4.1    |
| Fresh cheese                | 20  | 0.3 ± 0.3                        | Nd - 0.8   | 0.2 ± 0.3   | Nd - 1.1    | 0.4 ± 0.8     | Nd - 3.1    |
| Raw milk cheese             | 20  | 7.4 ± 12.9                       | Nd - 39.4  | 1.7 ± 5.3   | Nd - 21.1   | 129.5 ± 212.7 | Nd - 666.9  |
| Blue cheese                 | 20  | 16.2 ± 15.9                      | Nd - 68.9  | 1.5 ± 4.2   | Nd - 18.9   | 41.9 ± 72.7   | Nd - 252.3  |
| Hard cheese                 | 20  | 7.8 ± 10.3                       | Nd - 41.9  | 3.5 ± 5.6   | Nd - 18.1   | 87.0 ± 151.7  | Nd - 610.5  |
| Goat cheese                 | 20  | 2.5 ± 3.7                        | Nd - 14.3  | 0.6 ± 1.1   | Nd - 3.5    | 17.1 ± 40.9   | Nd - 184.0  |

Nd- not detected; All samples were analyzed in duplicate.
